# Supplementary material for: A Plant-Specific N-terminal Extension Reveals Evolutionary Functional Divergence within Translocator Proteins
Source: PubMed Central journal article supplement — iScience. 2020 Feb 7;23(3):100889. doi: 10.1016/j.isci.2020.100889 (PMC7033594; doi:10.1016/j.isci.2020.100889), 2020-02-07
Supplement: mmc2.pdf [file mmc2.pdf]

Original representative blots. Figure numbering in this section corresponds to the numbering used in the article.

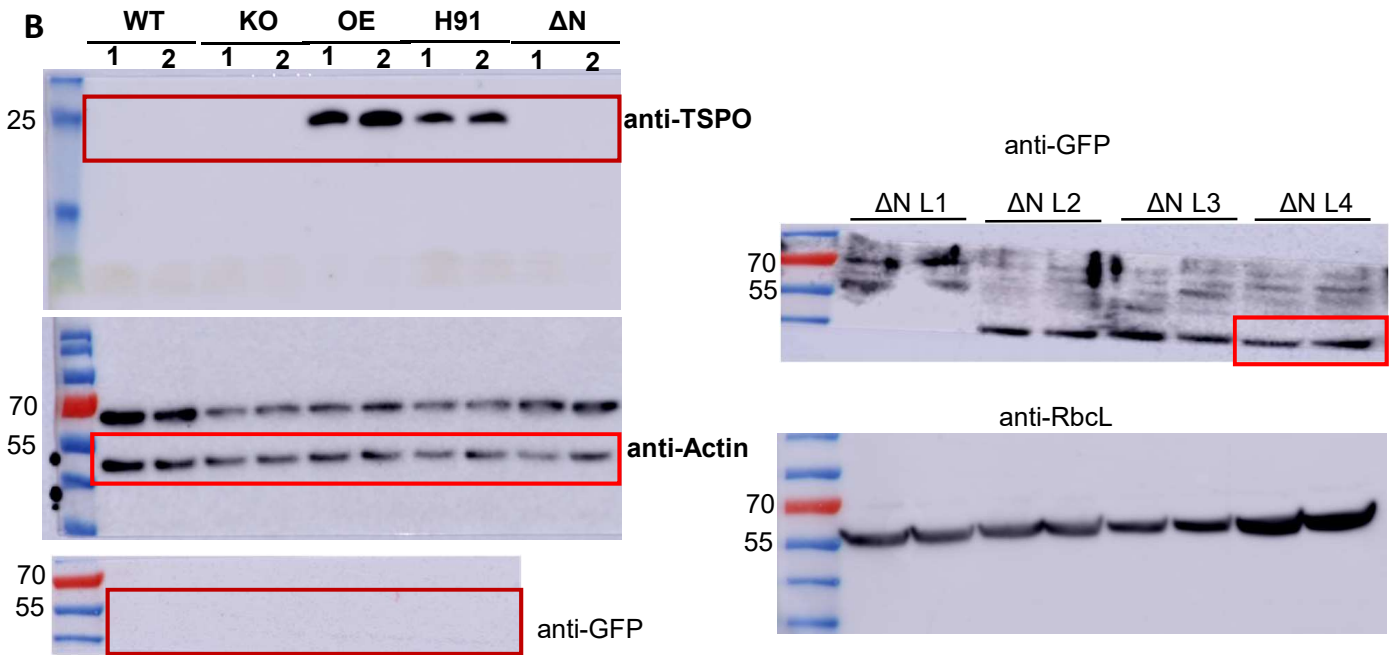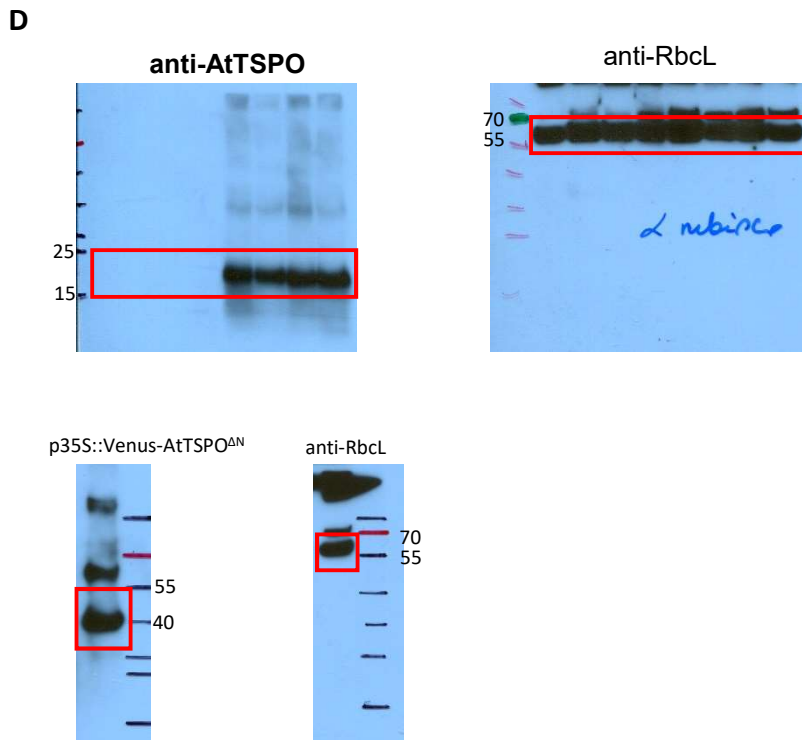

**Data S1: Original blots used to prepare Figure 1. Arabidopsis plants expressing the N-terminus truncated AtTSPO are more affected by water loss as compared to plants overexpressing the full-length AtTSPO.**

**c**

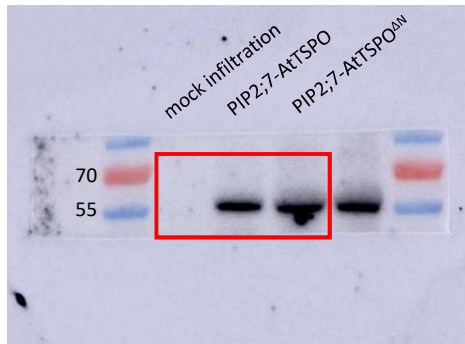

Venus<sub>N</sub>-PIP2;7

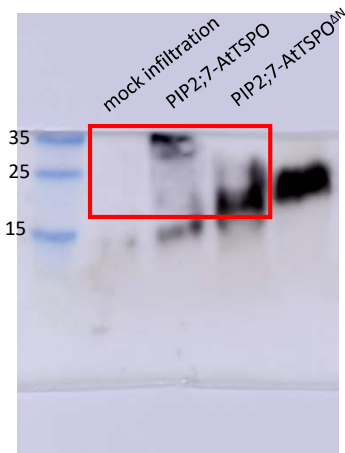

Venus<sub>C</sub>-AtTSPO

**Data S2: Original blots used to prepare Figure 2. The plant specific N-terminus extension of AtTSPO is required for AtTSPO interaction with the Arabidopsis PIP2;7 *in vivo*.**

**B**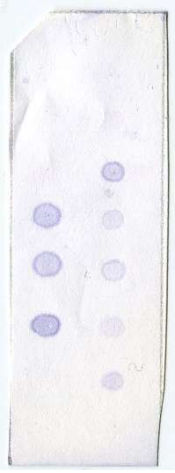**C**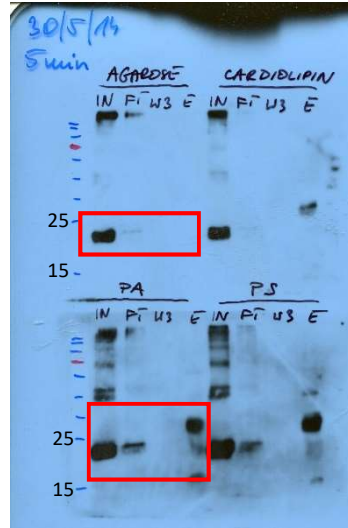

AtTSP0

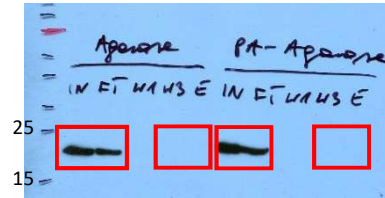AtTSP0<sup>ΔN</sup>**D**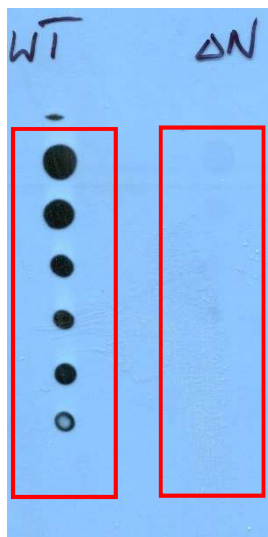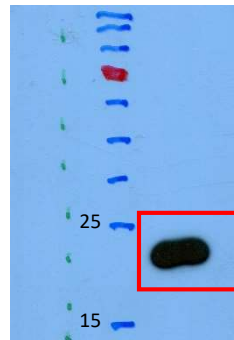

AtTSP0

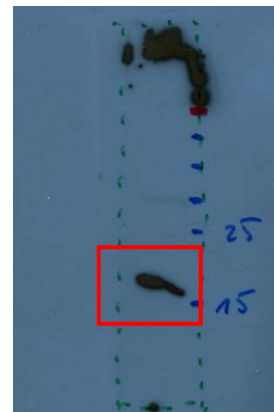AtTSP0<sup>ΔN</sup>

**Data S3: Original blots used to prepare Figure 3. Purified AtTSP0 binds defined anionic lipids *in vitro* and the binding requires the N-terminal peptide.**

**B**

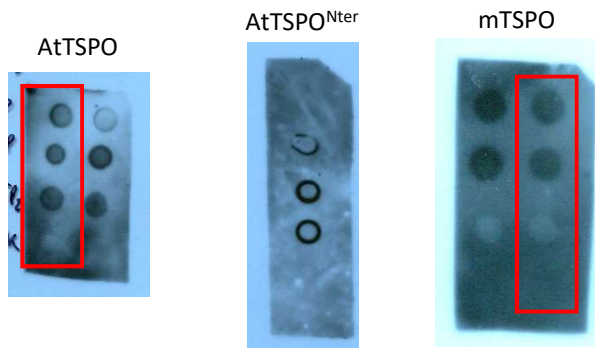

**C**

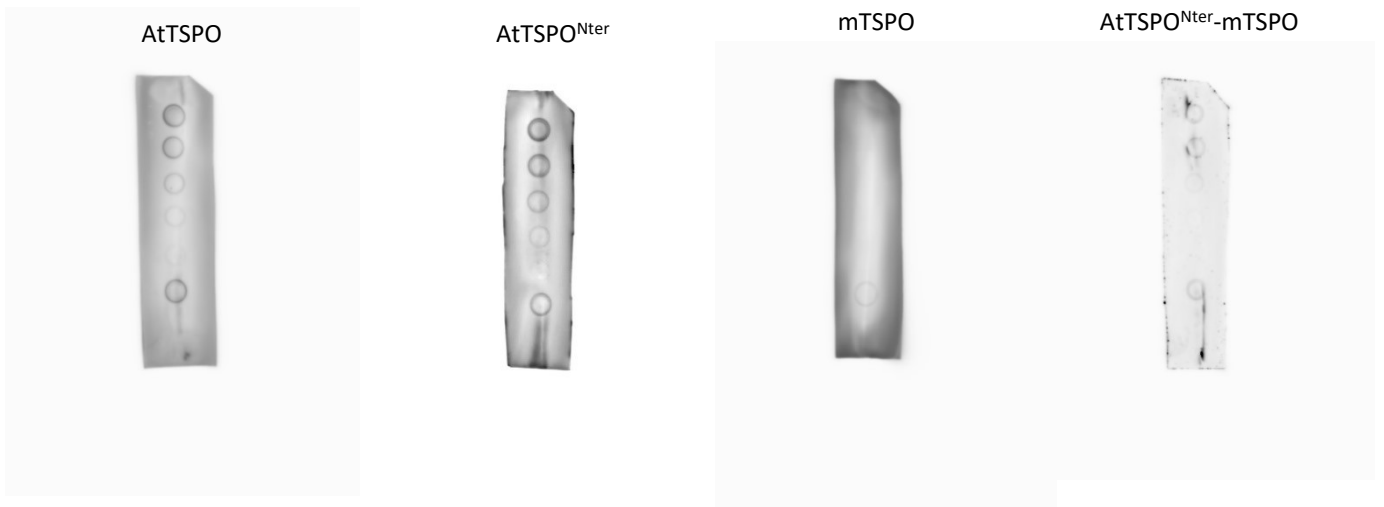

**Data S4: Original blots used to prepare Figure 4. The AtTSP0 N-terminal peptide is a PI(4,5)P<sub>2</sub> lipid binding moiety.**

**B**

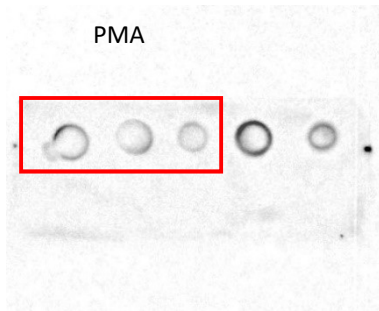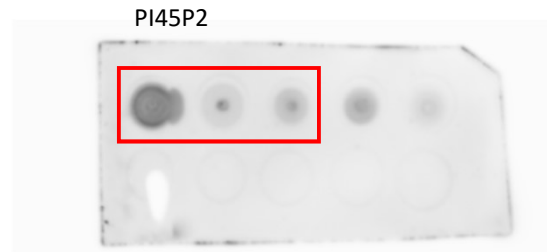

**Data S5: Original blots used to prepare Figure 5. In presence of the full-length AtTSPO but not AtTSPO<sup>ΔN</sup>, the PI(4,5)P<sub>2</sub> biosensor was depleted from the plasma membrane and partially colocalized with AtTSPO in the Golgi membranes.**

**C**

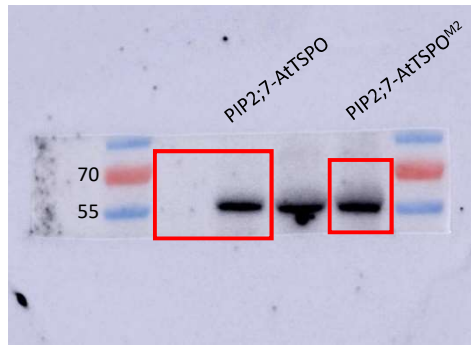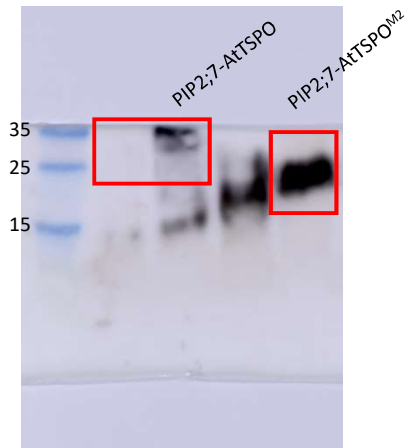

**Data S6: Original blots used to prepare Figure S2. The first 20 amino acids of AtTSPO are required for AtTSPO interaction *in vivo* with PIP2;7.**

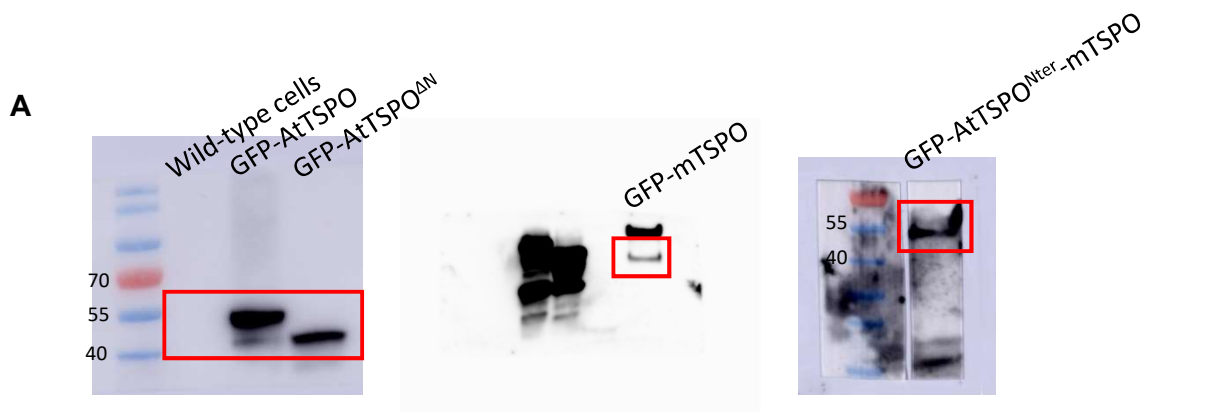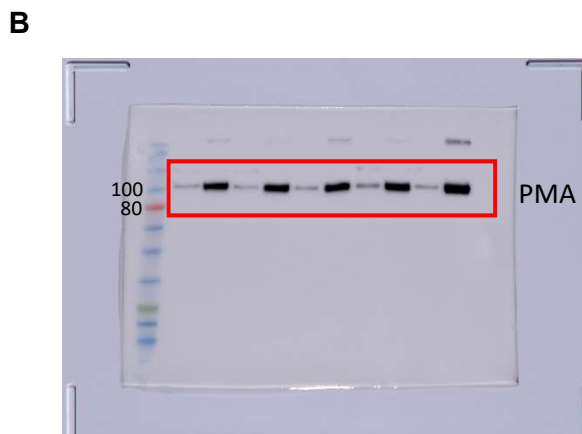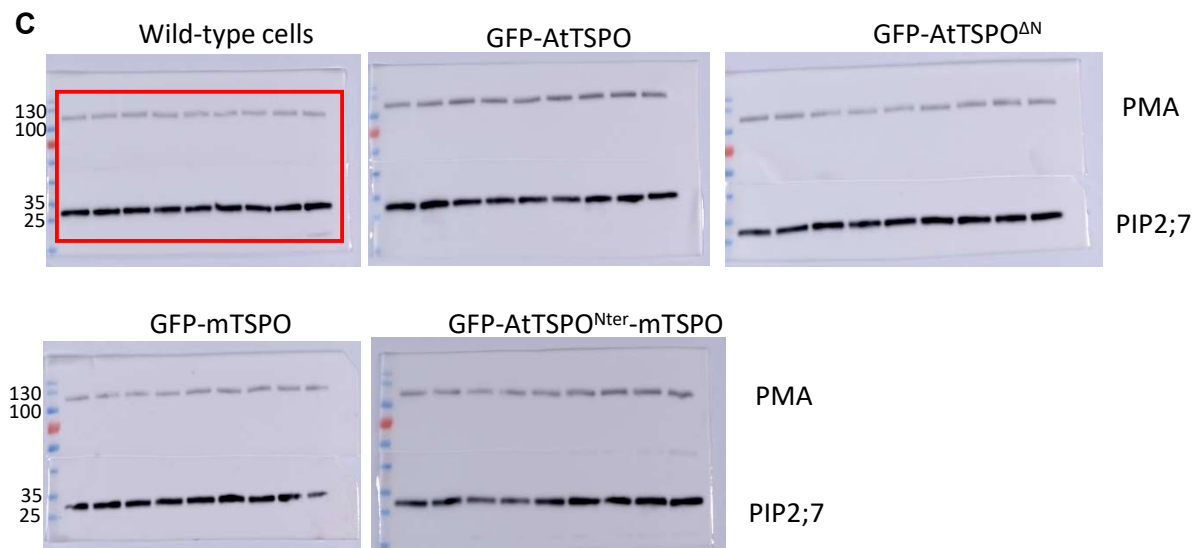

**Data S7: Original blots used to prepare Figure S4. Representative western blots for PIP2;7 aquaporin signal quantification in the plasma membrane-enriched fractions.**

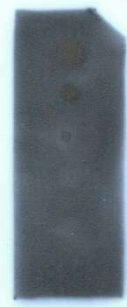

Original blots used to prepare Figure S6. Isolated AtTSP0 N-terminal peptide binds phosphatidic acid (PA) *in vitro*.

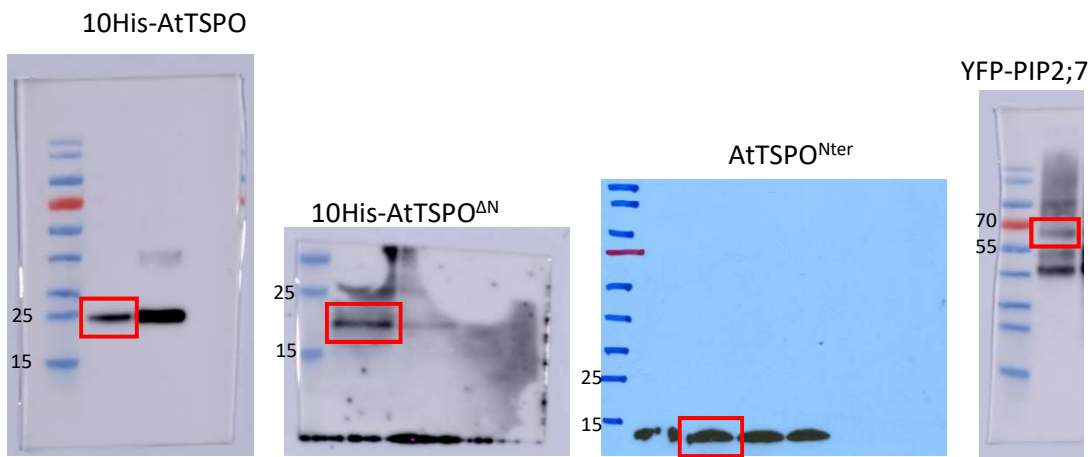

Data S8: Original blots used to prepare Figure S7. Western blot performed on protein samples applied in thermophoresis experiments.

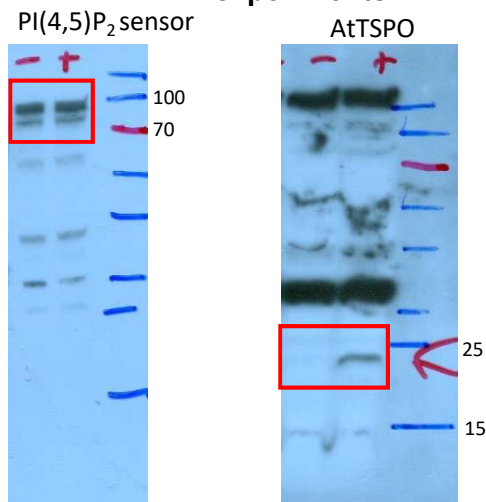

Data S9: Original blots used to prepare Figure S8. The PI(4,5)P<sub>2</sub> biosensor was depleted from the plasma membrane upon ABA treatment.
